# Supplementary material for: Drought effects on leaf fall, leaf flushing and stem growth inNeotropical forest; reconciling remote sensing data and fieldobservations
Source: Copernicus journal article supplement (doi:10.5194/bg-2021-30), 2021-02-22
Supplement: Supplementary file 1 [file bg-2021-30-supplement.pdf]

*Supplement of*

## **Drought effects on leaf fall, leaf flushing and stem growth in Neotropical forest; reconciling remote sensing data and field observations**

Thomas Janssen<sup>1</sup>, Ype van der Velde<sup>1</sup>, Florian Hofhansl<sup>2</sup>, Sebastiaan Luyssaert<sup>3</sup>, Kim Naudts<sup>1</sup>, Bart Driessen<sup>4</sup>, Katrin Fleischer<sup>5</sup> and Han Dolman<sup>1</sup>

<sup>1</sup> Department of Earth Sciences, Vrije Universiteit Amsterdam, Amsterdam, the Netherlands

<sup>2</sup> International Institute for Applied Systems Analysis (IIASA), Laxenburg, Austria

<sup>3</sup> Department of Ecological Sciences, Vrije Universiteit Amsterdam, Amsterdam, the Netherlands

<sup>4</sup> Department of Computer Science, Universidad de Alcala de Henares, Madrid, Spain

<sup>5</sup> Department of Biogeochemical Signals, Max Planck Institute for Biogeochemistry, Jena, Germany

*Correspondence to:* Thomas Janssen ([t.a.j.janssen@vu.nl](mailto:t.a.j.janssen@vu.nl))

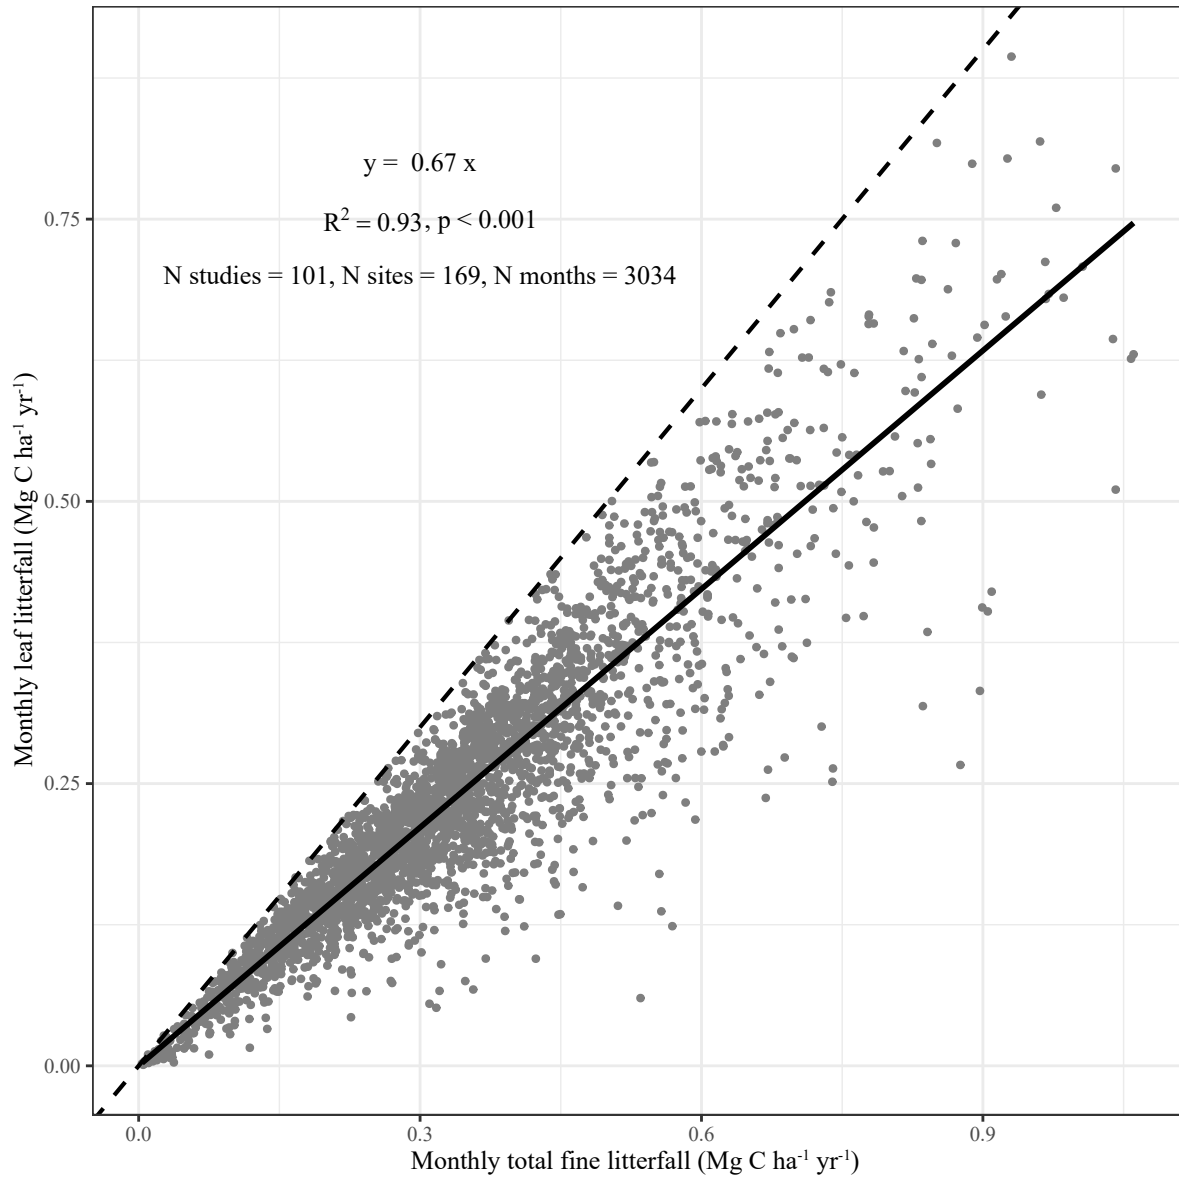

**Figure S1:** Relationship between monthly leaf litterfall and total fine litterfall. The solid black line represents a linear regression fit that is forced through the origin, which is used to estimate monthly leaf litterfall from studies that only reported total litterfall. The dashed black line represents the 0:0 line where total litterfall is equal to leaf litterfall.

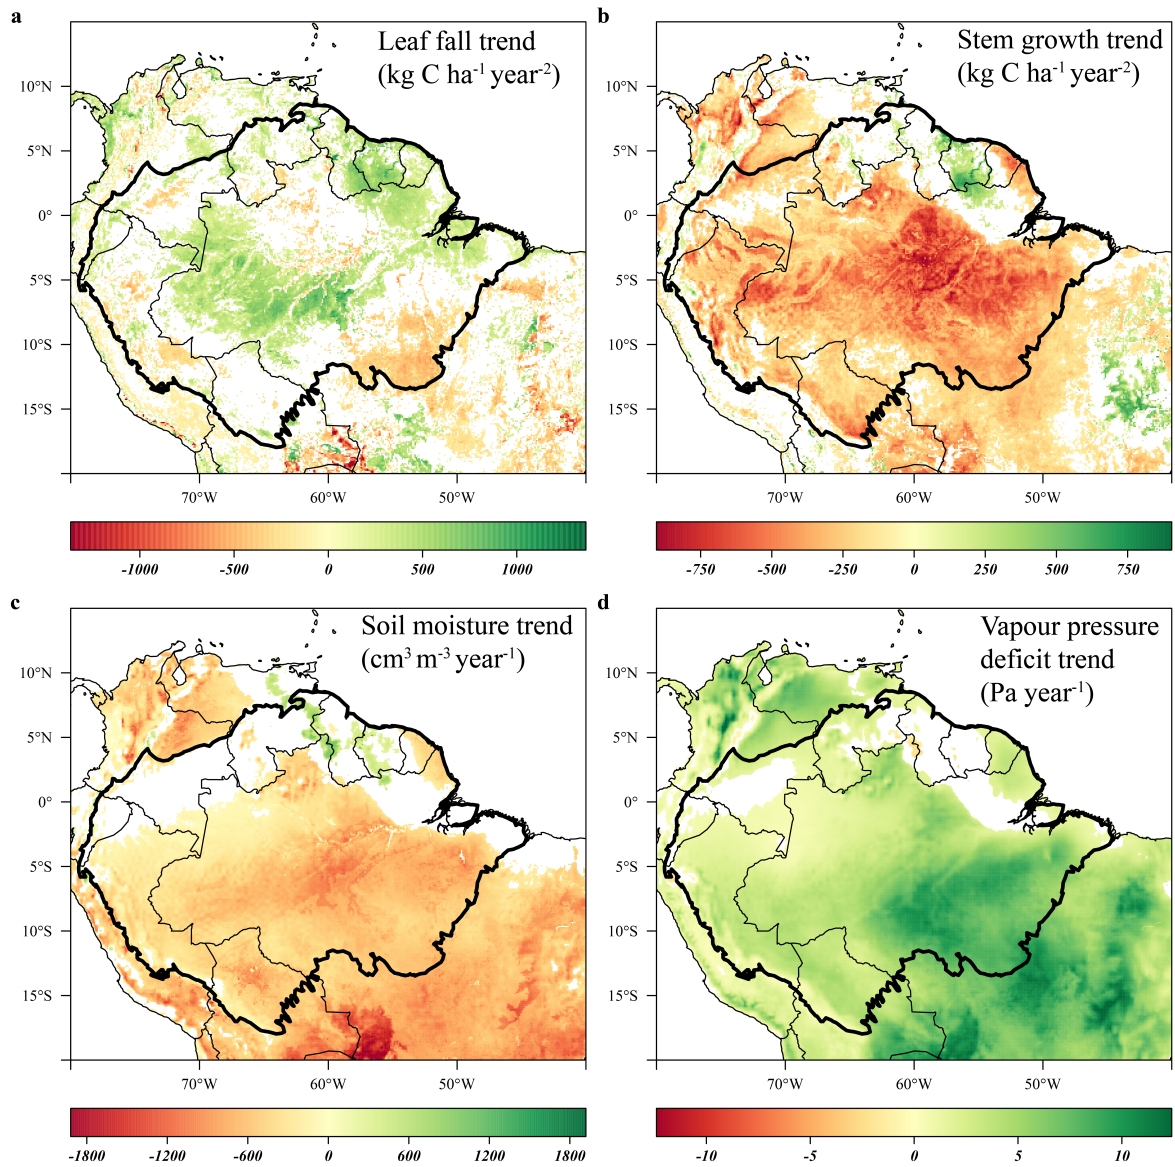

**Figure S2:** Long-term trends in modelled leaf litterfall and stem growth (1982-2019) and ERA5 topsoil volumetric moisture content and vapour pressure deficit (1981-2019). Only significant trends ( $p < 0.05$ ) are shown. Country borders and the extent of the Amazon basin are marked by thin and thick black lines, respectively.
